# Supplementary material for: Prolonged cell cycle arrest in response to DNA damage in yeast requires the maintenance of DNA damage signaling and the spindle assembly checkpoint
Source: eLife journal article supplement (doi:10.7554/elife.94334), 2024-01-30
Supplement: fig2-data1 [file elife-94334-fig2-data1-v1.zip]

**Myc blot**

**
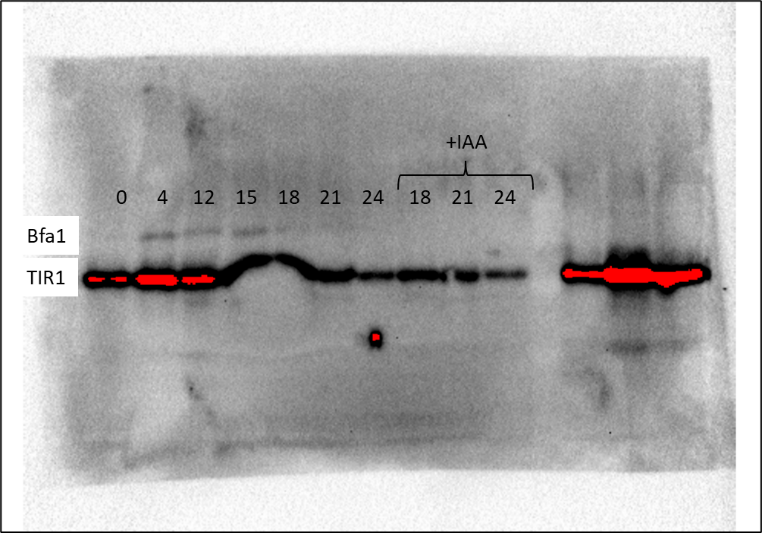
**

**Myc and Pgk1 blot**

**
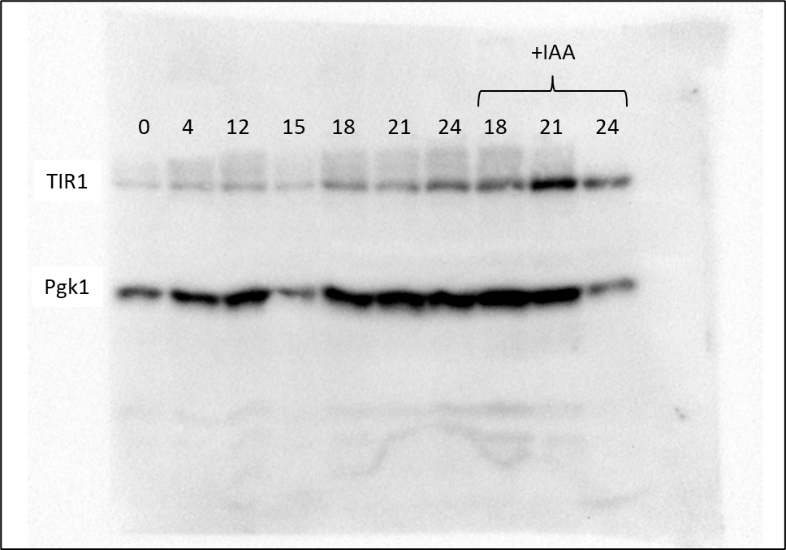
**

**Rad53 blot**

**
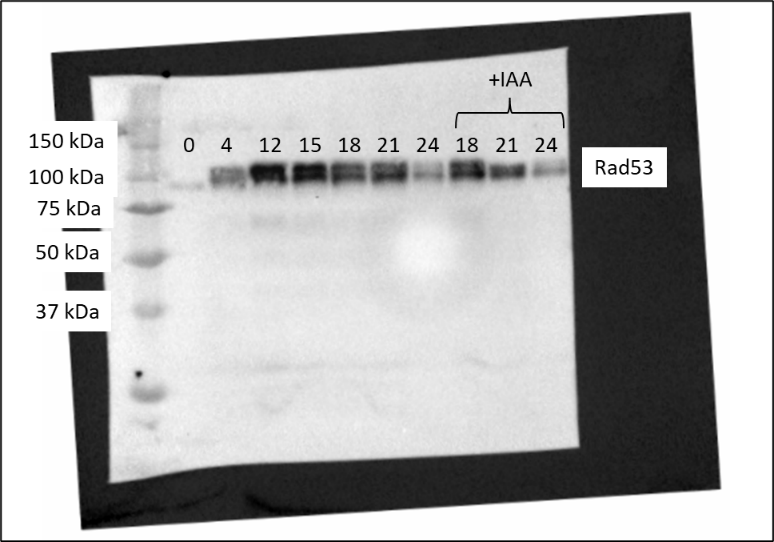
**

Figure 7 – Source Data 3. Original membranes corresponding to Figure 7 - panel C.
