# Supplementary material for: Prolonged cell cycle arrest in response to DNA damage in yeast requires the maintenance of DNA damage signaling and the spindle assembly checkpoint
Source: eLife journal article supplement (doi:10.7554/elife.94334), 2024-01-30
Supplement: fig2-figsupp2-data7 [file elife-94334-fig2-figsupp2-data7-v1.zip]

### Myc antibody

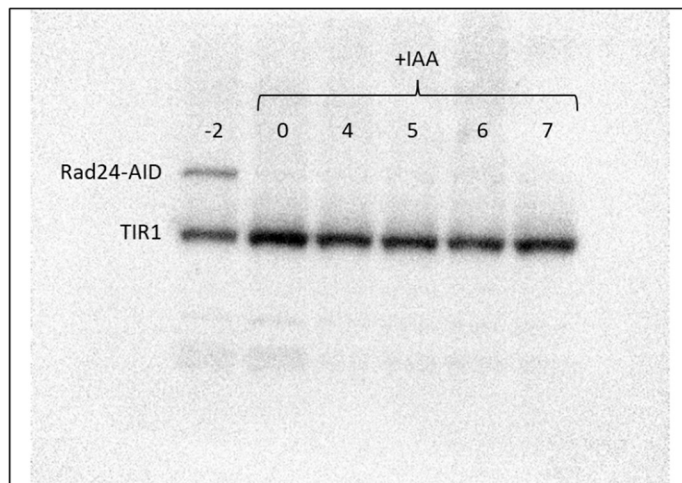

### Rad53 antibody

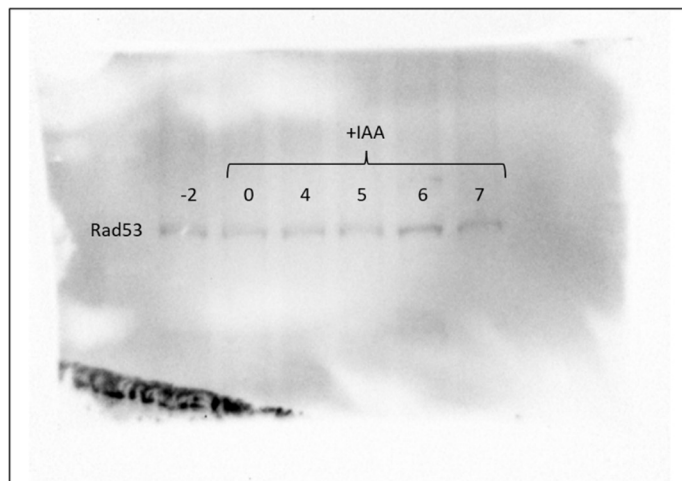

Figure 2 - figure supplement 2 – Source Data 7. Original membranes corresponding to Figure 2 - figure supplement 2, panel D.
