# Supplementary material for: Prolonged cell cycle arrest in response to DNA damage in yeast requires the maintenance of DNA damage signaling and the spindle assembly checkpoint
Source: eLife journal article supplement (doi:10.7554/elife.94334), 2024-01-30
Supplement: fig2-figsupp2-data9 [file elife-94334-fig2-figsupp2-data9-v1.zip]

**Myc antibody**

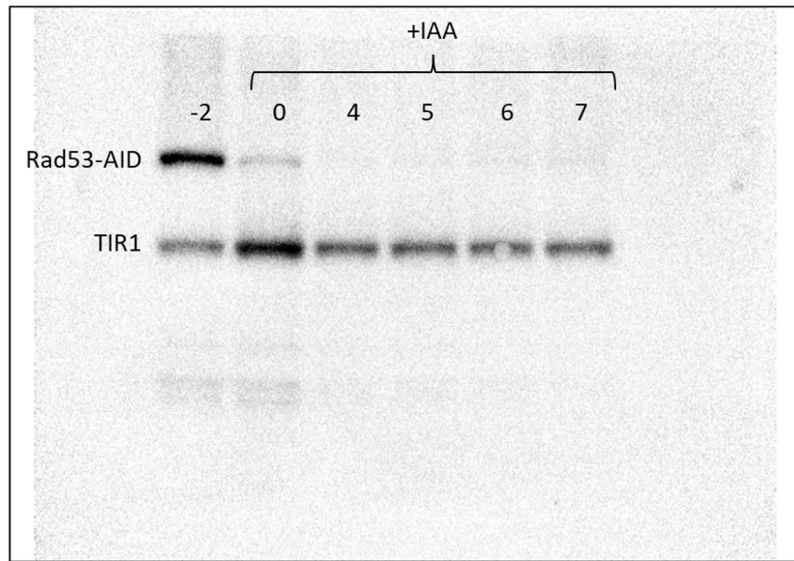

Figure 2 - figure supplement 2 – Source Data 9. Original membranes corresponding to Figure 2 - figure supplement 2, panel E.
