# Supplementary material for: Prolonged cell cycle arrest in response to DNA damage in yeast requires the maintenance of DNA damage signaling and the spindle assembly checkpoint
Source: eLife journal article supplement (doi:10.7554/elife.94334), 2024-01-30
Supplement: fig3-data5 [file elife-94334-fig3-data5-v1.zip]

### Myc antibody

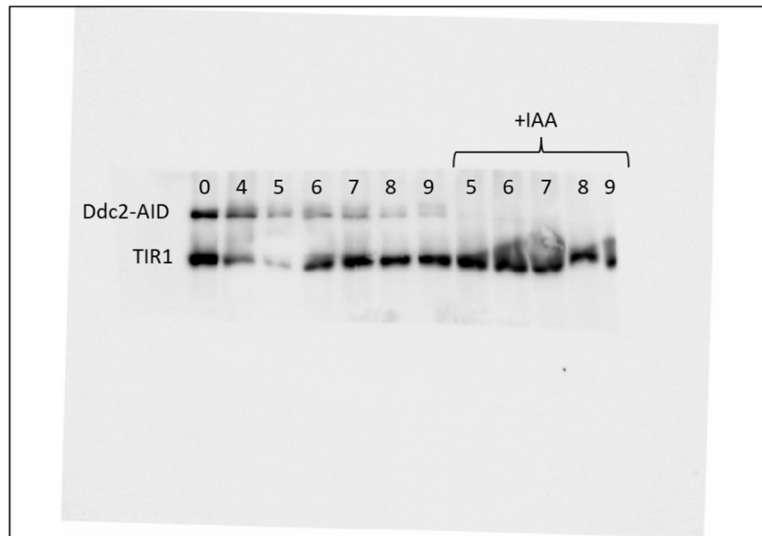

### Rad53 antibody

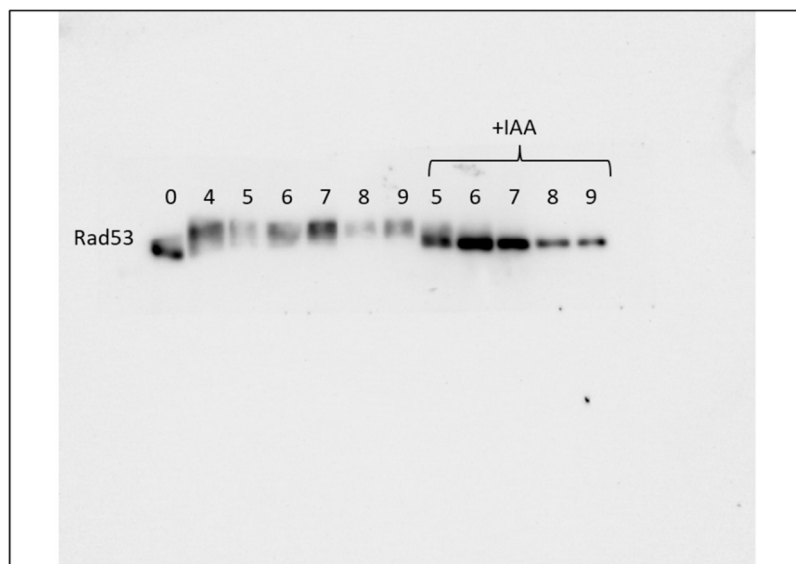

Figure 3 – Source Data 5. Original membranes corresponding to Figure 3, panel D.
