# Supplementary material for: Prolonged cell cycle arrest in response to DNA damage in yeast requires the maintenance of DNA damage signaling and the spindle assembly checkpoint
Source: eLife journal article supplement (doi:10.7554/elife.94334), 2024-01-30
Supplement: fig5-data1 [file elife-94334-fig5-data1-v1.zip]

### Myc antibody

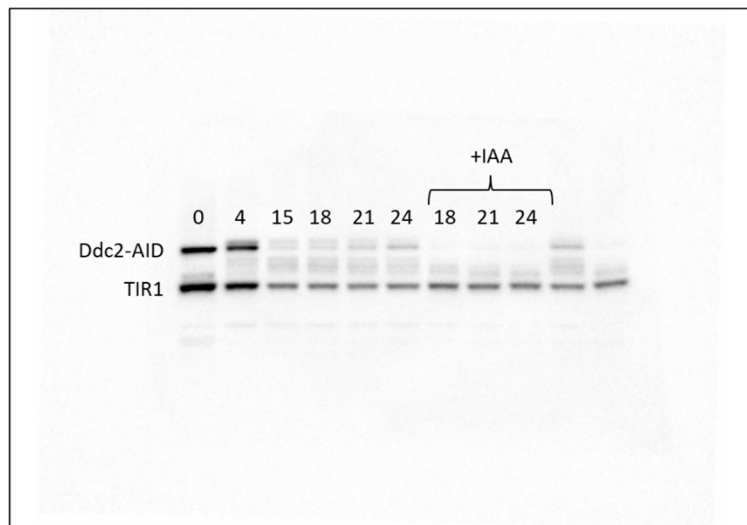

### Rad53 antibody

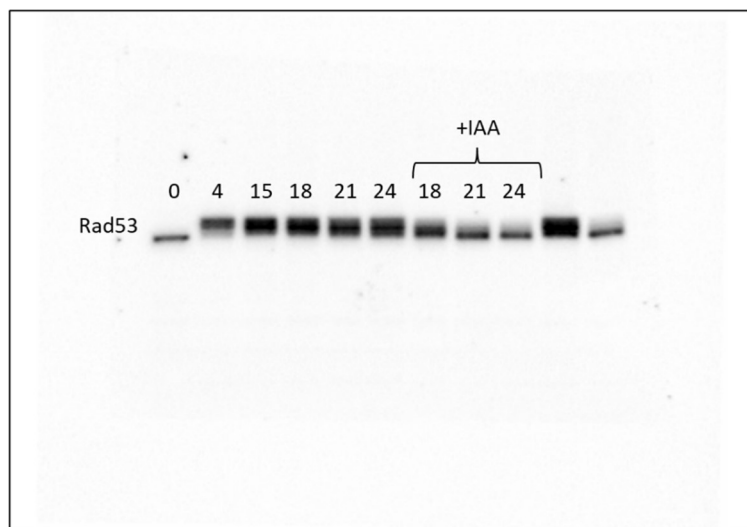

Figure 5 – Source Data 1. Original membranes corresponding to Figure 5, panel A. The 24 h  $\pm$  IAA samples were added to the last 2 wells.
