# Supplementary material for: Prolonged cell cycle arrest in response to DNA damage in yeast requires the maintenance of DNA damage signaling and the spindle assembly checkpoint
Source: eLife journal article supplement (doi:10.7554/elife.94334), 2024-01-30
Supplement: fig5-figsupp1-data3 [file elife-94334-fig5-figsupp1-data3-v1.zip]

**Myc, Pgk1, and Rad53 antibodies**

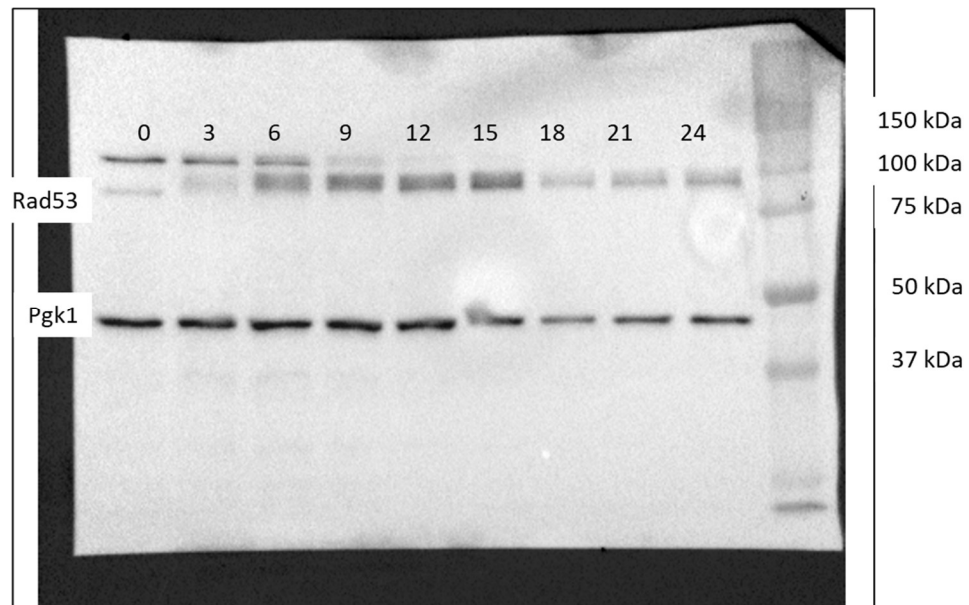

Figure 5 - figure supplement 1 – Source Data 3. Original membranes corresponding to Figure 5 - figure supplement 1, panel B.
