# Supplementary material for: Prolonged cell cycle arrest in response to DNA damage in yeast requires the maintenance of DNA damage signaling and the spindle assembly checkpoint
Source: eLife journal article supplement (doi:10.7554/elife.94334), 2024-01-30
Supplement: fig7-data1 [file elife-94334-fig7-data1-v1.zip]

### Myc and Pgk1 antibody

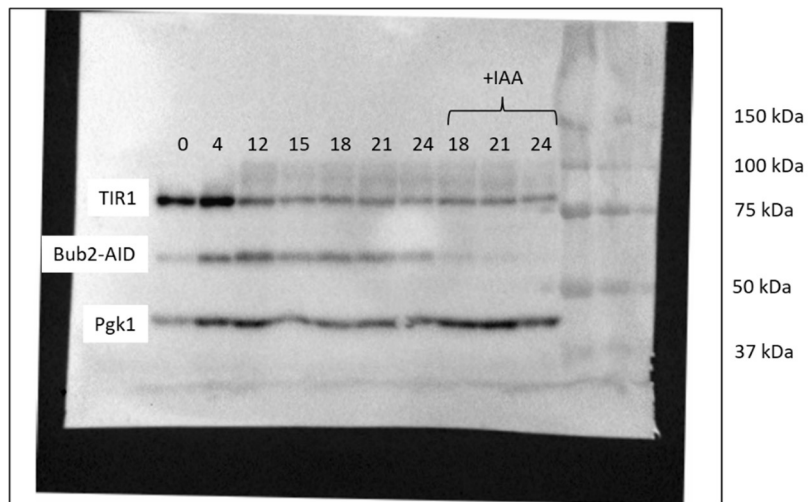

### Rad53 antibody

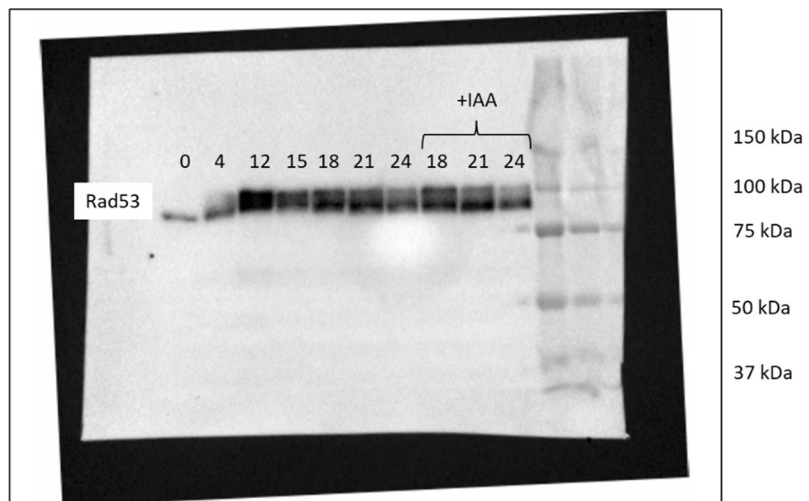

Figure 7 – Source Data 1. Original membranes corresponding to Figure 7, panel A.
