# Supplementary material for: Prolonged cell cycle arrest in response to DNA damage in yeast requires the maintenance of DNA damage signaling and the spindle assembly checkpoint
Source: eLife journal article supplement (doi:10.7554/elife.94334), 2024-01-30
Supplement: fig7-figsupp1-data3 [file elife-94334-fig7-figsupp1-data3-v1.zip]

**Myc blot**

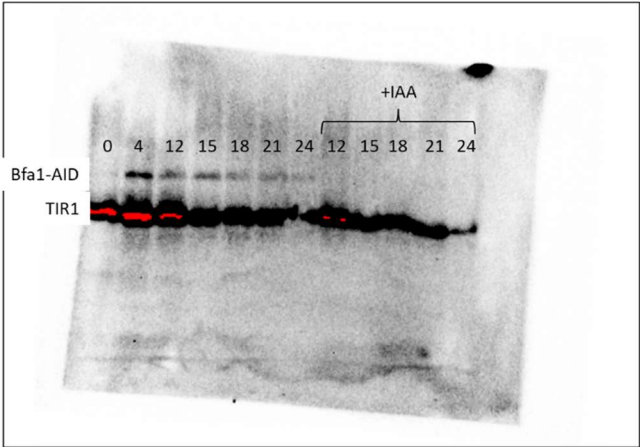

**Myc and Pgk1 blot**

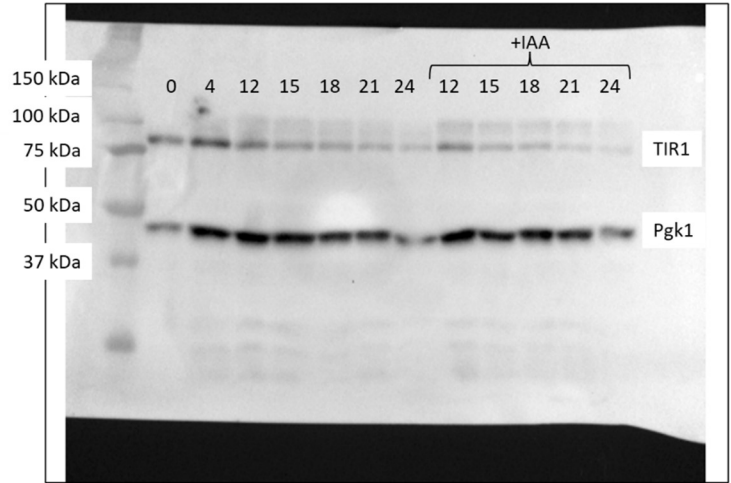

**Rad53 blot**

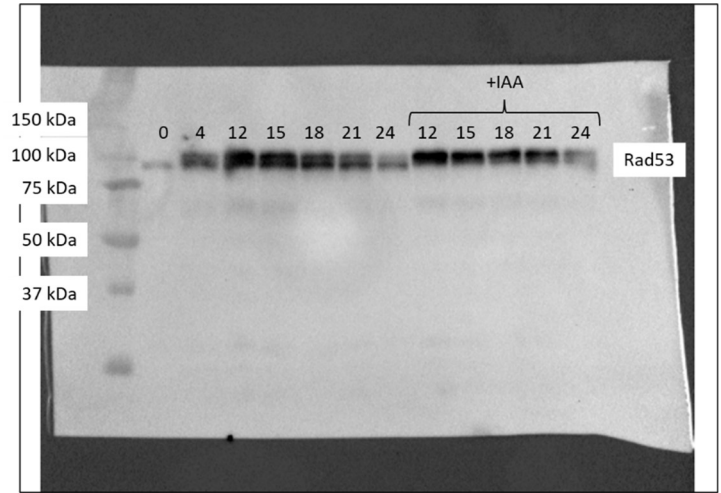

Figure 7 - figure supplement 1 – Source Data 3. Original membranes corresponding to Figure 7 - figure supplement 1, panel C.
