# Supplementary figures and images for: Prolonged cell cycle arrest in response to DNA damage in yeast requires the maintenance of DNA damage signaling and the spindle assembly checkpoint
Source: eLife journal article supplement (doi:10.7554/elife.94334), 2024-01-30

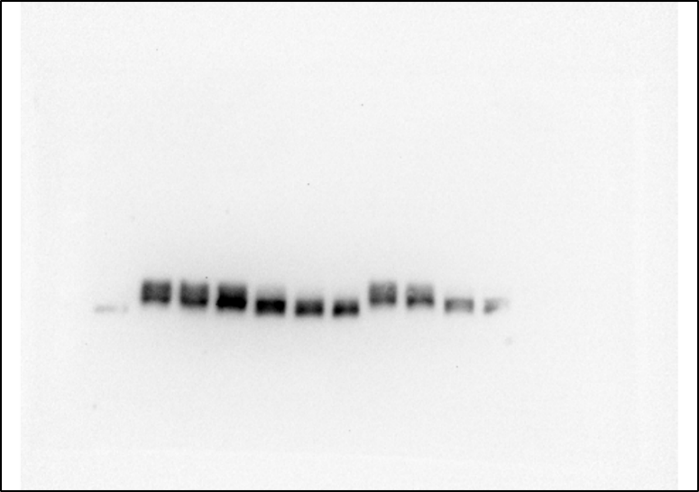

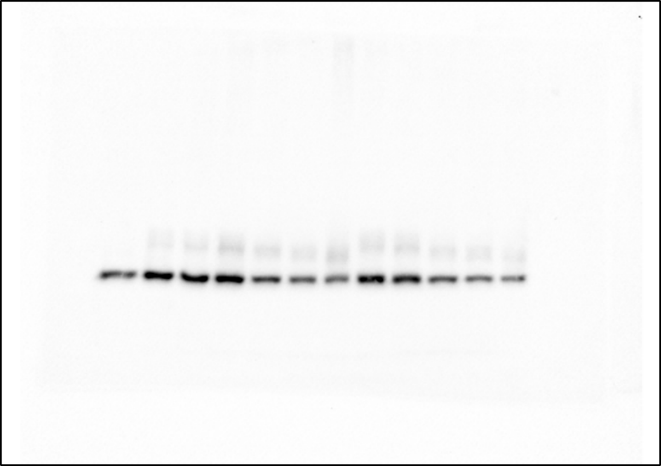


Figure 1 – Source Data 1. Original membranes corresponding to Figure 1, panel C.

Supplement: fig1-data1 [file elife-94334-fig1-data1-v1.zip]

### Myc and Rad53 antibody

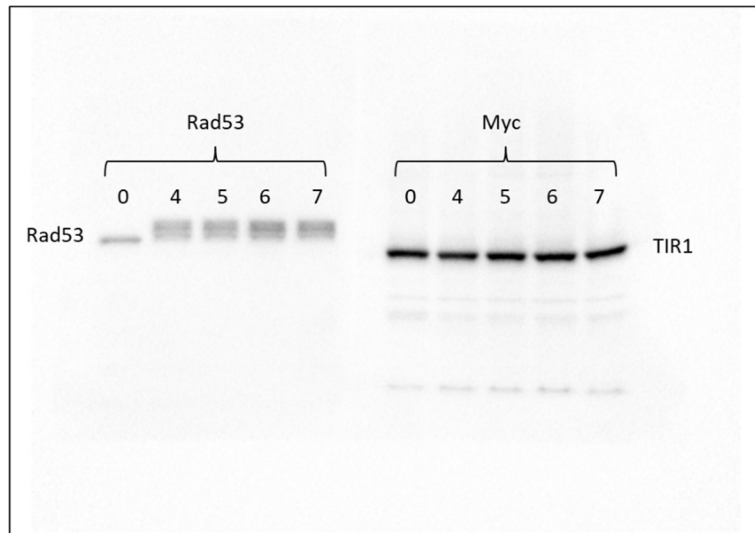

Figure 3 – Source Data 1. Original membranes corresponding to Figure 3, panel A.

Supplement: fig3-data1 [file elife-94334-fig3-data1-v1.zip]

## Myc antibody

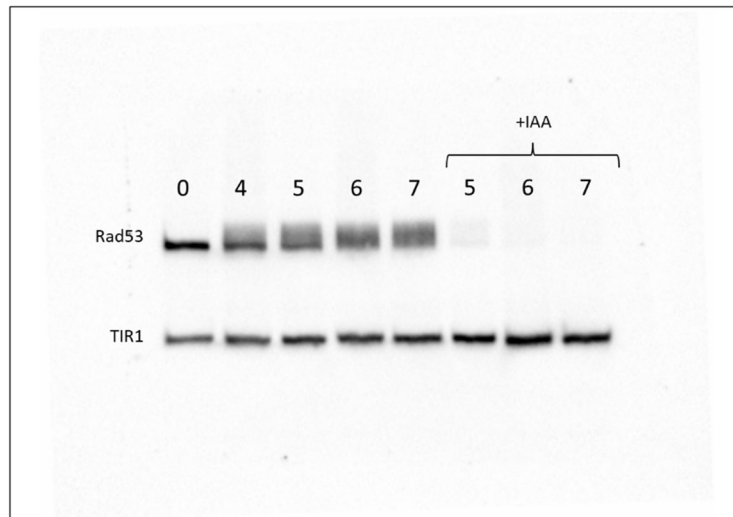

Figure 3 – Source Data 3. Original membranes corresponding to Figure 3, panel C.

Supplement: fig3-data3 [file elife-94334-fig3-data3-v1.zip]

## Myc and Pgk1 antibody

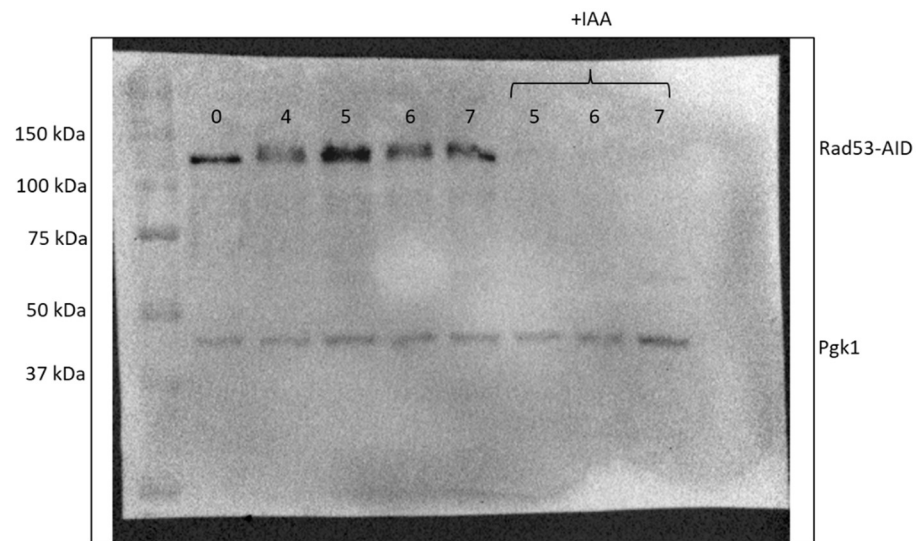

Figure 5 – Source Data 3. Original membranes corresponding to Figure 3, panel C.

Supplement: fig5-data3 [file elife-94334-fig5-data3-v1.zip]

**Myc and Pgk1 antibody**

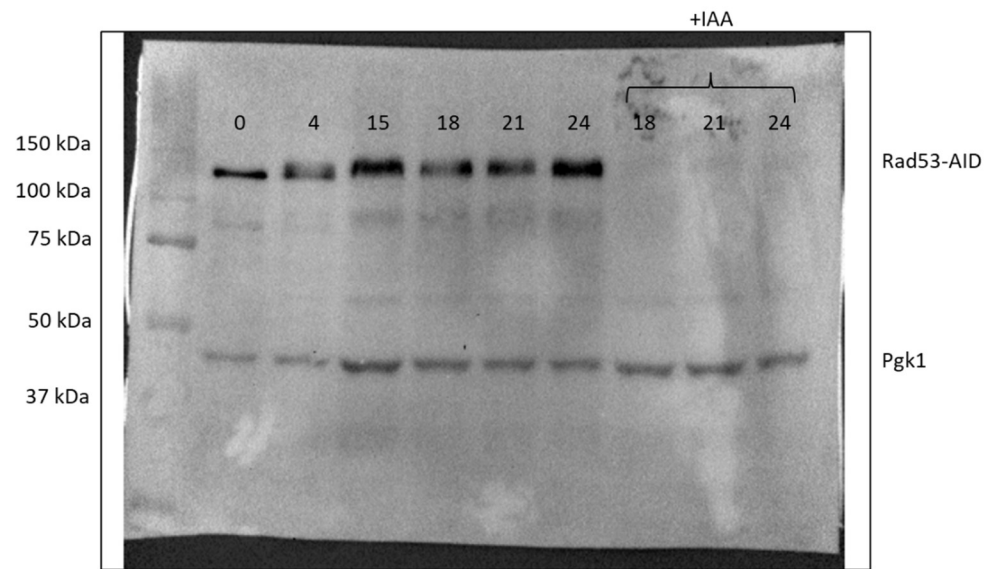

Figure 5 – Source Data 5. Original membranes corresponding to Figure 3, panel D.

Supplement: fig5-data5 [file elife-94334-fig5-data5-v1.zip]
